# Supplementary material for: Fast-LPG Sensors at Room Temperature by α-Fe2O3/CNT Nanocomposite Thin Films
Source: Hindawi journal article supplement (doi:10.1155/2018/9236450), 2018-01-01
Supplement: f1 [file 9236450.f1.pdf]

## Supplementary Material

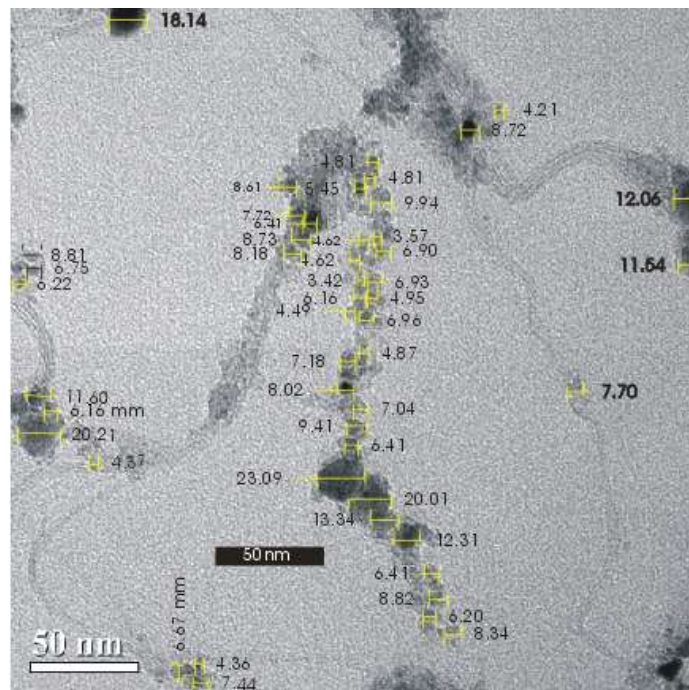

(a)

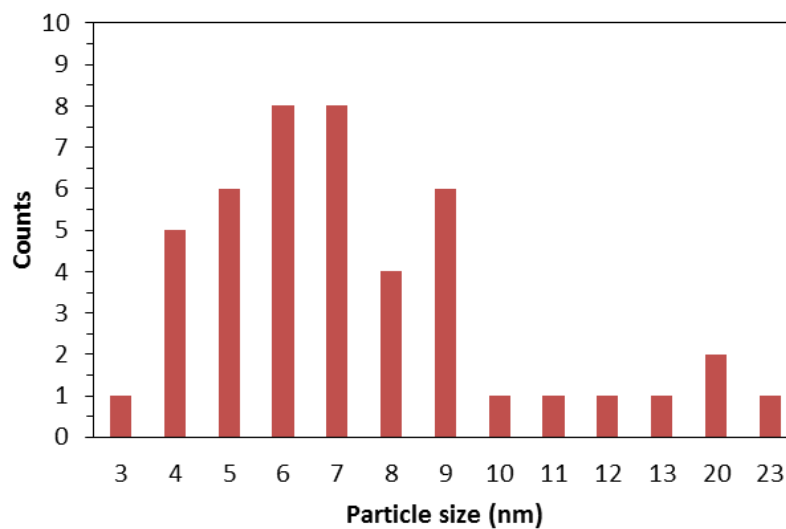

(b)

Figure S 1 (a) TEM images represent iron nanoparticles at surface of the growth of CNTs. (b) Particle-size distribution of the Fe NPs performed by measuring 45 individual NPs on the TEM images.
